# Supplementary material for: The first structural characterization and determination of the isomerization activation parameters of a chiral phosphatitanoceneElectronic supplementary information (ESI) available: X-ray structure determination. See http://www.rsc.org/suppdata/cc/b2/b208945a/
Source: Royal Society of Chemistry journal article supplement (doi:10.1039/b208945a), 2002-11-11
Supplement: b208945a.doc [file b208945a.doc]

# X-Ray Structure Determination

A black fragment of a prism (064 x 0.28 x 0.11 mm3) was used for the single crystal x-ray diffraction study of C24H24Cl2P2Ti (compound Bisphosphati, kh71s). The crystal was coated with epoxy resin before mounting it on to a glass fiber to prevent it from exposure to air. X-ray intensity data were collected at 223(2) K on a Bruker SMART 1000 (**ref. 1**) platform-CCD x-ray diffractometer system (Mo-radiation,  = 0.71073 Å, 50KV/40mA power). The CCD detector was placed at a distance of 4.0680 cm from the crystal.

A total of 1818 frames were collected for a sphere of reflections (with scan width of 0.3o in  and  angles of 0o, 120o, and 240o for every 606, 606, and 606 frames, respectively, 30sec/frame exposure time). The frames were integrated using the Bruker SAINTPLUS software package (**ref. 2**) and using a narrow-frame integration algorithm. Based on a triclinic crystal system, the integrated frames yielded a total of 11841 reflections at a maximum 2 angle of 56.56o (0.75 Å resolution), of which 5584 were independent reflections (Rint = 0.0240, Rsig = 0.0288, redundancy = 2.1, completeness = 99.6%) and 4673 (83.7%) reflections were greater than 2(I). The unit cell parameters were, **a** = 8.7827(8) Å, **b** = 8.8656(8) Å, **c** = 15.7127(14) Å, **** = 96.547(2)­­­o, **** = 106.049(2)o**, ** = 102.179(2)o, V = 1129.80(18) Å3, Z = 2, calculated density Dc = 1.450 g/cm3. Absorption corrections were applied (absorption coefficient  = 0.766 mm-1; max/min transmission = 0.9205/0.6399) to the raw intensity data using the SADABS program in the SAINTPLUS software (**ref. 2**).

The Bruker SHELXTL (Version 5.1) software package (**ref. 3**) was used for phase determination and structure refinement. The distribution of intensities (E2-1 = 0.923) indicated two possible space groups; P-1 and P1. The space group P-1 was later determined to be correct. Direct methods of phase determination followed by two Fourier cycles of refinement led to an electron density map from which most of the non-hydrogen atoms were identified in the asymmetry unit of the unit cell. With subsequent isotropic refinement, all of the non-hydrogen atoms were identified. There was one molecule of C24H24Cl2P2Ti present in the asymmetry unit of the unit cell.

Atomic coordinates, isotropic and anisotropic displacement parameters of all the non-hydrogen atoms were refined by means of a full matrix least-squares procedure on F2. The H-atoms were included in the refinement in calculated positions riding on the atoms to which they were attached. The refinement converged at R1 = 0.0330, wR2 = 0.0895, with intensity, I>2(I). The largest peak/hole in the final difference map was 0.504/-0.278 e/Å3.

# REFERENCES

1. SMART Software Reference Manual, Version 5.054, Bruker Analytical X-Ray System, Inc., Madison, WI 1997-1998.
2. SAINTPLUS Software Reference Manual, Version 5.02, Bruker Analytical X-Ray System, Inc., Madison, WI 1997-1998.
3. SHELXTL Software Reference Manual, Version 5.1, Bruker Analytical X-Ray System, Inc., Madison, WI 1997-1998.

Table 1. Crystal data and structure refinement for C24H24Cl2P2Ti.

Identification code kh71s

Empirical formula C24 H24 Cl2 P2 Ti

Formula weight 493.17

Temperature 223(2) K

Wavelength 0.71073 Å

Crystal system Triclinic

Space group P-1

Unit cell dimensions a = 8.7827(8) Å = 96.547(2)°.

b = 8.8656(8) Å = 106.049(2)°.

c = 15.7127(14) Å  = 102.179(2)°.

Volume 1129.80(18) Å3

Z 2

Density (calculated) 1.450 Mg/m3

Absorption coefficient 0.766 mm-1

F(000) 508

Crystal size 0.64 x 0.28 x 0.11 mm3

Theta range for data collection 1.37 to 28.28°.

Index ranges -11<=h<=11, -11<=k<=11, -20<=l<=20

Reflections collected 11841

Independent reflections 5584 [R(int) = 0.0240]

Completeness to theta = 28.28° 99.6 %

Absorption correction SADABS

Max. and min. transmission 0.9205 and 0.6399

Refinement method Full-matrix least-squares on F2

Data / restraints / parameters 5584 / 0 / 266

Goodness-of-fit on F2 1.027

Final R indices [I>2sigma(I)] R1 = 0.0330, wR2 = 0.0895

R indices (all data) R1 = 0.0410, wR2 = 0.0950

Largest diff. peak and hole 0.504 and -0.278 e.Å-3

Table 2. Atomic coordinates ( x 104) and equivalent isotropic displacement parameters (Å2x 103)

for C24H24Cl2P2Ti. U(eq) is defined as one third of the trace of the orthogonalized Uij tensor.

________________________________________________________________________________

x y z U(eq)

________________________________________________________________________________

Ti(1) 662(1) 4190(1) 7503(1) 22(1)

Cl(1) -1329(1) 1885(1) 7272(1) 43(1)

Cl(2) -445(1) 5651(1) 8401(1) 42(1)

P(1A) 1095(1) 4065(1) 5921(1) 25(1)

C(1A) -1029(2) 3763(2) 5783(1) 23(1)

C(2A) -1389(2) 5054(2) 6218(1) 27(1)

C(3A) 31(2) 6325(2) 6617(1) 30(1)

C(4A) 1458(2) 5939(2) 6569(1) 28(1)

C(5A) -24(3) 7956(2) 6974(2) 49(1)

C(6A) -3053(2) 5162(3) 6252(1) 43(1)

C(7A) -2202(2) 2332(2) 5193(1) 25(1)

C(8A) -3715(2) 2398(2) 4630(1) 32(1)

C(9A) -4749(2) 1090(2) 4009(1) 39(1)

C(10A) -4295(2) -305(2) 3936(1) 43(1)

C(11A) -2801(3) -387(2) 4486(1) 44(1)

C(12A) -1764(2) 907(2) 5111(1) 34(1)

P(1B) 3632(1) 3851(1) 7635(1) 30(1)

C(1B) 3581(2) 5355(2) 8469(1) 24(1)

C(2B) 2777(2) 4755(2) 9072(1) 27(1)

C(3B) 2054(2) 3117(2) 8807(1) 32(1)

C(4B) 2388(2) 2495(2) 8037(1) 34(1)

C(5B) 1149(3) 2154(3) 9326(1) 51(1)

C(6B) 2825(2) 5667(2) 9947(1) 36(1)

C(7B) 4455(2) 7012(2) 8546(1) 25(1)

C(8B) 5940(2) 7344(2) 8353(1) 31(1)

C(9B) 6769(2) 8874(2) 8394(1) 41(1)

C(10B) 6147(3) 10113(2) 8634(1) 43(1)

C(11B) 4694(3) 9803(2) 8834(1) 40(1)

C(12B) 3843(2) 8268(2) 8786(1) 32(1)

________________________________________________________________________________

Table 3. Bond lengths [Å] and angles [°] for C24H24Cl2P2Ti.

_____________________________________________________

Ti(1)-Cl(1) 2.3109(5)

Ti(1)-Cl(2) 2.3427(5)

Ti(1)-C(4A) 2.3818(15)

Ti(1)-C(4B) 2.4098(17)

Ti(1)-C(3B) 2.4793(16)

Ti(1)-C(1B) 2.5129(16)

Ti(1)-C(3A) 2.5393(16)

Ti(1)-C(2B) 2.5640(16)

Ti(1)-P(1A) 2.6104(5)

Ti(1)-C(2A) 2.6138(16)

Ti(1)-C(1A) 2.6395(15)

Ti(1)-P(1B) 2.6425(6)

P(1A)-C(4A) 1.7640(17)

P(1A)-C(1A) 1.7749(16)

C(1A)-C(2A) 1.405(2)

C(1A)-C(7A) 1.477(2)

C(2A)-C(3A) 1.425(2)

C(2A)-C(6A) 1.499(2)

C(3A)-C(4A) 1.386(3)

C(3A)-C(5A) 1.506(2)

C(7A)-C(8A) 1.396(2)

C(7A)-C(12A) 1.399(2)

C(8A)-C(9A) 1.389(3)

C(9A)-C(10A) 1.379(3)

C(10A)-C(11A) 1.378(3)

C(11A)-C(12A) 1.385(3)

P(1B)-C(4B) 1.743(2)

P(1B)-C(1B) 1.7763(16)

C(1B)-C(2B) 1.416(2)

C(1B)-C(7B) 1.481(2)

C(2B)-C(3B) 1.419(2)

C(2B)-C(6B) 1.498(2)

C(3B)-C(4B) 1.401(3)

C(3B)-C(5B) 1.503(2)

C(7B)-C(12B) 1.393(2)

C(7B)-C(8B) 1.399(2)

C(8B)-C(9B) 1.382(3)

C(9B)-C(10B) 1.386(3)

C(10B)-C(11B) 1.377(3)

C(11B)-C(12B) 1.390(3)

Cl(1)-Ti(1)-Cl(2) 94.59(2)

Cl(1)-Ti(1)-C(4A) 135.15(4)

Cl(2)-Ti(1)-C(4A) 103.62(5)

Cl(1)-Ti(1)-C(4B) 80.62(5)

Cl(2)-Ti(1)-C(4B) 124.62(5)

C(4A)-Ti(1)-C(4B) 118.34(6)

Cl(1)-Ti(1)-C(3B) 82.07(4)

Cl(2)-Ti(1)-C(3B) 91.34(5)

C(4A)-Ti(1)-C(3B) 136.84(6)

C(4B)-Ti(1)-C(3B) 33.28(6)

Cl(1)-Ti(1)-C(1B) 137.35(4)

Cl(2)-Ti(1)-C(1B) 94.73(4)

C(4A)-Ti(1)-C(1B) 82.07(6)

C(4B)-Ti(1)-C(1B) 60.09(6)

C(3B)-Ti(1)-C(1B) 56.18(5)

Cl(1)-Ti(1)-C(3A) 119.73(4)

Cl(2)-Ti(1)-C(3A) 77.28(4)

C(4A)-Ti(1)-C(3A) 32.51(6)

C(4B)-Ti(1)-C(3A) 150.85(6)

C(3B)-Ti(1)-C(3A) 155.75(6)

C(1B)-Ti(1)-C(3A) 102.93(6)

Cl(1)-Ti(1)-C(2B) 111.88(4)

Cl(2)-Ti(1)-C(2B) 76.43(4)

C(4A)-Ti(1)-C(2B) 112.12(6)

C(4B)-Ti(1)-C(2B) 55.81(6)

C(3B)-Ti(1)-C(2B) 32.62(5)

C(1B)-Ti(1)-C(2B) 32.38(5)

C(3A)-Ti(1)-C(2B) 123.14(6)

Cl(1)-Ti(1)-P(1A) 101.084(18)

Cl(2)-Ti(1)-P(1A) 138.491(19)

C(4A)-Ti(1)-P(1A) 41.07(4)

C(4B)-Ti(1)-P(1A) 95.93(5)

C(3B)-Ti(1)-P(1A) 128.58(5)

C(1B)-Ti(1)-P(1A) 98.97(4)

C(3A)-Ti(1)-P(1A) 61.53(4)

C(2B)-Ti(1)-P(1A) 129.81(4)

Cl(1)-Ti(1)-C(2A) 87.84(4)

Cl(2)-Ti(1)-C(2A) 81.73(4)

C(4A)-Ti(1)-C(2A) 55.66(6)

C(4B)-Ti(1)-C(2A) 151.75(6)

C(3B)-Ti(1)-C(2A) 167.28(6)

C(1B)-Ti(1)-C(2A) 134.71(5)

C(3A)-Ti(1)-C(2A) 32.07(6)

C(2B)-Ti(1)-C(2A) 151.43(5)

P(1A)-Ti(1)-C(2A) 60.97(4)

Cl(1)-Ti(1)-C(1A) 76.04(4)

Cl(2)-Ti(1)-C(1A) 111.03(4)

C(4A)-Ti(1)-C(1A) 59.22(5)

C(4B)-Ti(1)-C(1A) 120.74(6)

C(3B)-Ti(1)-C(1A) 149.59(6)

C(1B)-Ti(1)-C(1A) 136.99(5)

C(3A)-Ti(1)-C(1A) 53.81(5)

C(2B)-Ti(1)-C(1A) 169.18(5)

P(1A)-Ti(1)-C(1A) 39.52(3)

C(2A)-Ti(1)-C(1A) 31.01(5)

Cl(1)-Ti(1)-P(1B) 115.31(2)

Cl(2)-Ti(1)-P(1B) 134.666(19)

C(4A)-Ti(1)-P(1B) 79.26(4)

C(4B)-Ti(1)-P(1B) 40.04(5)

C(3B)-Ti(1)-P(1B) 62.28(5)

C(1B)-Ti(1)-P(1B) 40.21(4)

C(3A)-Ti(1)-P(1B) 111.32(4)

C(2B)-Ti(1)-P(1B) 61.46(4)

P(1A)-Ti(1)-P(1B) 70.689(15)

C(2A)-Ti(1)-P(1B) 129.72(4)

C(1A)-Ti(1)-P(1B) 108.88(4)

C(4A)-P(1A)-C(1A) 89.48(8)

C(4A)-P(1A)-Ti(1) 62.50(5)

C(1A)-P(1A)-Ti(1) 71.12(5)

C(2A)-C(1A)-C(7A) 127.49(15)

C(2A)-C(1A)-P(1A) 112.42(12)

C(7A)-C(1A)-P(1A) 119.87(12)

C(2A)-C(1A)-Ti(1) 73.48(9)

C(7A)-C(1A)-Ti(1) 128.99(10)

P(1A)-C(1A)-Ti(1) 69.36(5)

C(1A)-C(2A)-C(3A) 111.93(15)

C(1A)-C(2A)-C(6A) 125.87(16)

C(3A)-C(2A)-C(6A) 122.17(16)

C(1A)-C(2A)-Ti(1) 75.50(9)

C(3A)-C(2A)-Ti(1) 71.09(9)

C(6A)-C(2A)-Ti(1) 122.41(11)

C(4A)-C(3A)-C(2A) 112.78(15)

C(4A)-C(3A)-C(5A) 123.26(18)

C(2A)-C(3A)-C(5A) 123.73(17)

C(4A)-C(3A)-Ti(1) 67.48(9)

C(2A)-C(3A)-Ti(1) 76.84(9)

C(5A)-C(3A)-Ti(1) 127.86(12)

C(3A)-C(4A)-P(1A) 112.99(13)

C(3A)-C(4A)-Ti(1) 80.01(10)

P(1A)-C(4A)-Ti(1) 76.44(6)

C(8A)-C(7A)-C(12A) 117.81(16)

C(8A)-C(7A)-C(1A) 120.84(15)

C(12A)-C(7A)-C(1A) 120.99(15)

C(9A)-C(8A)-C(7A) 120.94(17)

C(10A)-C(9A)-C(8A) 120.45(17)

C(11A)-C(10A)-C(9A) 119.26(18)

C(10A)-C(11A)-C(12A) 120.84(19)

C(11A)-C(12A)-C(7A) 120.69(17)

C(4B)-P(1B)-C(1B) 88.96(8)

C(4B)-P(1B)-Ti(1) 62.78(6)

C(1B)-P(1B)-Ti(1) 65.97(5)

C(2B)-C(1B)-C(7B) 125.96(14)

C(2B)-C(1B)-P(1B) 112.44(12)

C(7B)-C(1B)-P(1B) 121.30(11)

C(2B)-C(1B)-Ti(1) 75.79(9)

C(7B)-C(1B)-Ti(1) 123.07(10)

P(1B)-C(1B)-Ti(1) 73.82(5)

C(1B)-C(2B)-C(3B) 112.05(15)

C(1B)-C(2B)-C(6B) 125.16(15)

C(3B)-C(2B)-C(6B) 122.44(15)

C(1B)-C(2B)-Ti(1) 71.83(9)

C(3B)-C(2B)-Ti(1) 70.41(9)

C(6B)-C(2B)-Ti(1) 130.81(12)

C(4B)-C(3B)-C(2B) 111.56(15)

C(4B)-C(3B)-C(5B) 124.29(17)

C(2B)-C(3B)-C(5B) 124.02(17)

C(4B)-C(3B)-Ti(1) 70.64(9)

C(2B)-C(3B)-Ti(1) 76.97(9)

C(5B)-C(3B)-Ti(1) 123.09(13)

C(3B)-C(4B)-P(1B) 114.56(13)

C(3B)-C(4B)-Ti(1) 76.09(10)

P(1B)-C(4B)-Ti(1) 77.19(6)

C(12B)-C(7B)-C(8B) 118.04(16)

C(12B)-C(7B)-C(1B) 122.68(15)

C(8B)-C(7B)-C(1B) 119.27(15)

C(9B)-C(8B)-C(7B) 120.91(17)

C(8B)-C(9B)-C(10B) 120.48(18)

C(11B)-C(10B)-C(9B) 119.18(17)

C(10B)-C(11B)-C(12B) 120.79(18)

C(11B)-C(12B)-C(7B) 120.58(17)

_____________________________________________________________

Symmetry transformations used to generate equivalent atoms:

Table 4. Anisotropic displacement parameters (Å2x 103) for C24H24Cl2P2Ti. The anisotropic

displacement factor exponent takes the form: -22[ h2 a*2U11 + ... + 2 h k a* b* U12 ]

______________________________________________________________________________

U11 U22 U33 U23 U13 U12

______________________________________________________________________________

Ti(1) 20(1) 26(1) 19(1) 6(1) 5(1) 3(1)

Cl(1) 34(1) 47(1) 34(1) 19(1) -1(1) -13(1)

Cl(2) 37(1) 71(1) 27(1) 7(1) 13(1) 27(1)

P(1A) 24(1) 31(1) 22(1) 4(1) 9(1) 5(1)

C(1A) 25(1) 27(1) 20(1) 8(1) 6(1) 7(1)

C(2A) 31(1) 31(1) 22(1) 8(1) 6(1) 13(1)

C(3A) 42(1) 26(1) 23(1) 7(1) 6(1) 10(1)

C(4A) 33(1) 26(1) 22(1) 7(1) 6(1) -1(1)

C(5A) 69(2) 28(1) 45(1) 1(1) 7(1) 18(1)

C(6A) 36(1) 57(1) 36(1) 0(1) 6(1) 26(1)

C(7A) 25(1) 29(1) 21(1) 4(1) 8(1) 4(1)

C(8A) 28(1) 38(1) 27(1) 6(1) 5(1) 5(1)

C(9A) 28(1) 49(1) 30(1) 3(1) 3(1) 2(1)

C(10A) 36(1) 44(1) 37(1) -10(1) 8(1) -5(1)

C(11A) 41(1) 32(1) 53(1) -7(1) 14(1) 6(1)

C(12A) 29(1) 33(1) 37(1) 1(1) 8(1) 7(1)

P(1B) 26(1) 30(1) 31(1) 0(1) 7(1) 10(1)

C(1B) 21(1) 26(1) 23(1) 4(1) 3(1) 6(1)

C(2B) 23(1) 31(1) 22(1) 7(1) 2(1) 5(1)

C(3B) 31(1) 32(1) 28(1) 12(1) 0(1) 3(1)

C(4B) 35(1) 23(1) 38(1) 5(1) 0(1) 7(1)

C(5B) 52(1) 50(1) 36(1) 24(1) 1(1) -11(1)

C(6B) 36(1) 46(1) 22(1) 5(1) 7(1) 5(1)

C(7B) 22(1) 29(1) 19(1) 4(1) 2(1) 3(1)

C(8B) 26(1) 36(1) 28(1) 4(1) 8(1) 3(1)

C(9B) 35(1) 47(1) 34(1) 6(1) 13(1) -7(1)

C(10B) 52(1) 30(1) 34(1) 6(1) 7(1) -6(1)

C(11B) 48(1) 27(1) 37(1) 2(1) 4(1) 9(1)

C(12B) 32(1) 29(1) 33(1) 3(1) 7(1) 6(1)

______________________________________________________________________________

Table 5. Hydrogen coordinates ( x 104) and isotropic displacement parameters (Å2x 10 3)

for C24H24Cl2P2Ti.

________________________________________________________________________________

x y z U(eq)

________________________________________________________________________________

H(4A) 2509 6606 6853 34

H(5A1) 1080 8583 7294 74

H(5A2) -678 7902 7381 74

H(5A3) -509 8435 6476 74

H(6A1) -3554 5645 5760 64

H(6A2) -2949 5794 6821 64

H(6A3) -3732 4118 6196 64

H(8A) -4039 3342 4671 38

H(9A) -5765 1156 3636 47

H(10A) -4996 -1190 3516 52

H(11A) -2483 -1332 4436 52

H(12A) -754 827 5484 41

H(4B) 1974 1432 7760 41

H(5B1) 518 1151 8948 76

H(5B2) 416 2707 9509 76

H(5B3) 1927 1984 9856 76

H(6B1) 3756 6578 10138 54

H(6B2) 2928 5007 10401 54

H(6B3) 1823 6005 9869 54

H(8B) 6380 6516 8193 37

H(9B) 7762 9075 8258 50

H(10B) 6710 11153 8659 51

H(11B) 4273 10639 9005 48

H(12B) 2845 8076 8917 39

________________________________________________________________________________

Table 6. Torsion angles [°] for C24H24Cl2P2Ti.

________________________________________________________________

Cl(1)-Ti(1)-P(1A)-C(4A) 151.03(7)

Cl(2)-Ti(1)-P(1A)-C(4A) 40.89(7)

C(4B)-Ti(1)-P(1A)-C(4A) -127.40(8)

C(3B)-Ti(1)-P(1A)-C(4A) -120.32(8)

C(1B)-Ti(1)-P(1A)-C(4A) -66.82(7)

C(3A)-Ti(1)-P(1A)-C(4A) 33.09(8)

C(2B)-Ti(1)-P(1A)-C(4A) -77.86(8)

C(2A)-Ti(1)-P(1A)-C(4A) 69.81(8)

C(1A)-Ti(1)-P(1A)-C(4A) 99.62(8)

P(1B)-Ti(1)-P(1A)-C(4A) -95.83(7)

Cl(1)-Ti(1)-P(1A)-C(1A) 51.41(6)

Cl(2)-Ti(1)-P(1A)-C(1A) -58.74(6)

C(4A)-Ti(1)-P(1A)-C(1A) -99.62(8)

C(4B)-Ti(1)-P(1A)-C(1A) 132.98(7)

C(3B)-Ti(1)-P(1A)-C(1A) 140.06(8)

C(1B)-Ti(1)-P(1A)-C(1A) -166.44(7)

C(3A)-Ti(1)-P(1A)-C(1A) -66.53(7)

C(2B)-Ti(1)-P(1A)-C(1A) -177.48(7)

C(2A)-Ti(1)-P(1A)-C(1A) -29.81(7)

P(1B)-Ti(1)-P(1A)-C(1A) 164.54(6)

C(4A)-P(1A)-C(1A)-C(2A) 0.06(12)

Ti(1)-P(1A)-C(1A)-C(2A) 61.05(10)

C(4A)-P(1A)-C(1A)-C(7A) 175.03(13)

Ti(1)-P(1A)-C(1A)-C(7A) -123.99(12)

C(4A)-P(1A)-C(1A)-Ti(1) -60.99(5)

Cl(1)-Ti(1)-C(1A)-C(2A) 109.76(10)

Cl(2)-Ti(1)-C(1A)-C(2A) 20.17(10)

C(4A)-Ti(1)-C(1A)-C(2A) -73.54(10)

C(4B)-Ti(1)-C(1A)-C(2A) 179.68(10)

C(3B)-Ti(1)-C(1A)-C(2A) 154.98(12)

C(1B)-Ti(1)-C(1A)-C(2A) -102.62(11)

C(3A)-Ti(1)-C(1A)-C(2A) -34.83(10)

C(2B)-Ti(1)-C(1A)-C(2A) -112.1(3)

P(1A)-Ti(1)-C(1A)-C(2A) -122.46(11)

P(1B)-Ti(1)-C(1A)-C(2A) -137.88(9)

Cl(1)-Ti(1)-C(1A)-C(7A) -15.46(13)

Cl(2)-Ti(1)-C(1A)-C(7A) -105.05(13)

C(4A)-Ti(1)-C(1A)-C(7A) 161.25(16)

C(4B)-Ti(1)-C(1A)-C(7A) 54.47(15)

C(3B)-Ti(1)-C(1A)-C(7A) 29.8(2)

C(1B)-Ti(1)-C(1A)-C(7A) 132.16(13)

C(3A)-Ti(1)-C(1A)-C(7A) -160.04(16)

C(2B)-Ti(1)-C(1A)-C(7A) 122.7(3)

P(1A)-Ti(1)-C(1A)-C(7A) 112.32(15)

C(2A)-Ti(1)-C(1A)-C(7A) -125.21(18)

P(1B)-Ti(1)-C(1A)-C(7A) 96.90(13)

Cl(1)-Ti(1)-C(1A)-P(1A) -127.78(5)

Cl(2)-Ti(1)-C(1A)-P(1A) 142.63(4)

C(4A)-Ti(1)-C(1A)-P(1A) 48.93(6)

C(4B)-Ti(1)-C(1A)-P(1A) -57.85(8)

C(3B)-Ti(1)-C(1A)-P(1A) -82.56(11)

C(1B)-Ti(1)-C(1A)-P(1A) 19.84(9)

C(3A)-Ti(1)-C(1A)-P(1A) 87.63(7)

C(2B)-Ti(1)-C(1A)-P(1A) 10.4(3)

C(2A)-Ti(1)-C(1A)-P(1A) 122.46(11)

P(1B)-Ti(1)-C(1A)-P(1A) -15.42(5)

C(7A)-C(1A)-C(2A)-C(3A) -170.87(14)

P(1A)-C(1A)-C(2A)-C(3A) 3.63(17)

Ti(1)-C(1A)-C(2A)-C(3A) 62.29(11)

C(7A)-C(1A)-C(2A)-C(6A) 7.1(3)

P(1A)-C(1A)-C(2A)-C(6A) -178.42(14)

Ti(1)-C(1A)-C(2A)-C(6A) -119.75(17)

C(7A)-C(1A)-C(2A)-Ti(1) 126.84(15)

P(1A)-C(1A)-C(2A)-Ti(1) -58.66(8)

Cl(1)-Ti(1)-C(2A)-C(1A) -66.06(9)

Cl(2)-Ti(1)-C(2A)-C(1A) -161.02(10)

C(4A)-Ti(1)-C(2A)-C(1A) 86.18(10)

C(4B)-Ti(1)-C(2A)-C(1A) -0.57(18)

C(3B)-Ti(1)-C(2A)-C(1A) -103.5(3)

C(1B)-Ti(1)-C(2A)-C(1A) 110.51(10)

C(3A)-Ti(1)-C(2A)-C(1A) 119.76(14)

C(2B)-Ti(1)-C(2A)-C(1A) 158.68(11)

P(1A)-Ti(1)-C(2A)-C(1A) 37.88(8)

P(1B)-Ti(1)-C(2A)-C(1A) 55.58(11)

Cl(1)-Ti(1)-C(2A)-C(3A) 174.18(10)

Cl(2)-Ti(1)-C(2A)-C(3A) 79.22(9)

C(4A)-Ti(1)-C(2A)-C(3A) -33.57(10)

C(4B)-Ti(1)-C(2A)-C(3A) -120.33(14)

C(3B)-Ti(1)-C(2A)-C(3A) 136.8(2)

C(1B)-Ti(1)-C(2A)-C(3A) -9.25(13)

C(2B)-Ti(1)-C(2A)-C(3A) 38.92(16)

P(1A)-Ti(1)-C(2A)-C(3A) -81.88(9)

C(1A)-Ti(1)-C(2A)-C(3A) -119.76(14)

P(1B)-Ti(1)-C(2A)-C(3A) -64.17(11)

Cl(1)-Ti(1)-C(2A)-C(6A) 57.49(14)

Cl(2)-Ti(1)-C(2A)-C(6A) -37.46(14)

C(4A)-Ti(1)-C(2A)-C(6A) -150.26(16)

C(4B)-Ti(1)-C(2A)-C(6A) 122.98(16)

C(3B)-Ti(1)-C(2A)-C(6A) 20.1(3)

C(1B)-Ti(1)-C(2A)-C(6A) -125.93(14)

C(3A)-Ti(1)-C(2A)-C(6A) -116.68(18)

C(2B)-Ti(1)-C(2A)-C(6A) -77.76(19)

P(1A)-Ti(1)-C(2A)-C(6A) 161.44(16)

C(1A)-Ti(1)-C(2A)-C(6A) 123.56(19)

P(1B)-Ti(1)-C(2A)-C(6A) 179.14(12)

C(1A)-C(2A)-C(3A)-C(4A) -6.6(2)

C(6A)-C(2A)-C(3A)-C(4A) 175.33(15)

Ti(1)-C(2A)-C(3A)-C(4A) 58.34(12)

C(1A)-C(2A)-C(3A)-C(5A) 168.04(16)

C(6A)-C(2A)-C(3A)-C(5A) -10.0(3)

Ti(1)-C(2A)-C(3A)-C(5A) -126.99(17)

C(1A)-C(2A)-C(3A)-Ti(1) -64.97(12)

C(6A)-C(2A)-C(3A)-Ti(1) 116.99(15)

Cl(1)-Ti(1)-C(3A)-C(4A) -128.54(9)

Cl(2)-Ti(1)-C(3A)-C(4A) 143.43(10)

C(4B)-Ti(1)-C(3A)-C(4A) 1.15(17)

C(3B)-Ti(1)-C(3A)-C(4A) 79.70(17)

C(1B)-Ti(1)-C(3A)-C(4A) 51.44(11)

C(2B)-Ti(1)-C(3A)-C(4A) 79.19(11)

P(1A)-Ti(1)-C(3A)-C(4A) -41.85(9)

C(2A)-Ti(1)-C(3A)-C(4A) -121.83(14)

C(1A)-Ti(1)-C(3A)-C(4A) -88.18(11)

P(1B)-Ti(1)-C(3A)-C(4A) 10.16(10)

Cl(1)-Ti(1)-C(3A)-C(2A) -6.70(11)

Cl(2)-Ti(1)-C(3A)-C(2A) -94.73(9)

C(4A)-Ti(1)-C(3A)-C(2A) 121.83(14)

C(4B)-Ti(1)-C(3A)-C(2A) 122.98(13)

C(3B)-Ti(1)-C(3A)-C(2A) -158.47(14)

C(1B)-Ti(1)-C(3A)-C(2A) 173.27(9)

C(2B)-Ti(1)-C(3A)-C(2A) -158.97(9)

P(1A)-Ti(1)-C(3A)-C(2A) 79.98(9)

C(1A)-Ti(1)-C(3A)-C(2A) 33.66(9)

P(1B)-Ti(1)-C(3A)-C(2A) 131.99(9)

Cl(1)-Ti(1)-C(3A)-C(5A) 116.02(17)

Cl(2)-Ti(1)-C(3A)-C(5A) 27.99(18)

C(4A)-Ti(1)-C(3A)-C(5A) -115.4(2)

C(4B)-Ti(1)-C(3A)-C(5A) -114.30(19)

C(3B)-Ti(1)-C(3A)-C(5A) -35.7(3)

C(1B)-Ti(1)-C(3A)-C(5A) -64.01(19)

C(2B)-Ti(1)-C(3A)-C(5A) -36.3(2)

P(1A)-Ti(1)-C(3A)-C(5A) -157.3(2)

C(2A)-Ti(1)-C(3A)-C(5A) 122.7(2)

C(1A)-Ti(1)-C(3A)-C(5A) 156.4(2)

P(1B)-Ti(1)-C(3A)-C(5A) -105.29(18)

C(2A)-C(3A)-C(4A)-P(1A) 6.72(17)

C(5A)-C(3A)-C(4A)-P(1A) -167.97(14)

Ti(1)-C(3A)-C(4A)-P(1A) 70.53(8)

C(2A)-C(3A)-C(4A)-Ti(1) -63.80(12)

C(5A)-C(3A)-C(4A)-Ti(1) 121.50(16)

C(1A)-P(1A)-C(4A)-C(3A) -3.87(12)

Ti(1)-P(1A)-C(4A)-C(3A) -72.77(11)

C(1A)-P(1A)-C(4A)-Ti(1) 68.90(6)

Cl(1)-Ti(1)-C(4A)-C(3A) 74.40(11)

Cl(2)-Ti(1)-C(4A)-C(3A) -36.72(10)

C(4B)-Ti(1)-C(4A)-C(3A) -179.36(10)

C(3B)-Ti(1)-C(4A)-C(3A) -143.80(10)

C(1B)-Ti(1)-C(4A)-C(3A) -129.70(10)

C(2B)-Ti(1)-C(4A)-C(3A) -117.39(10)

P(1A)-Ti(1)-C(4A)-C(3A) 116.77(12)

C(2A)-Ti(1)-C(4A)-C(3A) 33.11(9)

C(1A)-Ti(1)-C(4A)-C(3A) 69.86(10)

P(1B)-Ti(1)-C(4A)-C(3A) -170.37(10)

Cl(1)-Ti(1)-C(4A)-P(1A) -42.37(9)

Cl(2)-Ti(1)-C(4A)-P(1A) -153.49(4)

C(4B)-Ti(1)-C(4A)-P(1A) 63.87(8)

C(3B)-Ti(1)-C(4A)-P(1A) 99.43(9)

C(1B)-Ti(1)-C(4A)-P(1A) 113.54(6)

C(3A)-Ti(1)-C(4A)-P(1A) -116.77(12)

C(2B)-Ti(1)-C(4A)-P(1A) 125.84(6)

C(2A)-Ti(1)-C(4A)-P(1A) -83.66(7)

C(1A)-Ti(1)-C(4A)-P(1A) -46.90(5)

P(1B)-Ti(1)-C(4A)-P(1A) 72.86(5)

C(2A)-C(1A)-C(7A)-C(8A) 34.3(2)

P(1A)-C(1A)-C(7A)-C(8A) -139.82(14)

Ti(1)-C(1A)-C(7A)-C(8A) 133.51(14)

C(2A)-C(1A)-C(7A)-C(12A) -152.63(17)

P(1A)-C(1A)-C(7A)-C(12A) 33.2(2)

Ti(1)-C(1A)-C(7A)-C(12A) -53.4(2)

C(12A)-C(7A)-C(8A)-C(9A) 0.1(3)

C(1A)-C(7A)-C(8A)-C(9A) 173.34(16)

C(7A)-C(8A)-C(9A)-C(10A) -0.2(3)

C(8A)-C(9A)-C(10A)-C(11A) -0.1(3)

C(9A)-C(10A)-C(11A)-C(12A) 0.4(3)

C(10A)-C(11A)-C(12A)-C(7A) -0.6(3)

C(8A)-C(7A)-C(12A)-C(11A) 0.3(3)

C(1A)-C(7A)-C(12A)-C(11A) -172.96(17)

Cl(1)-Ti(1)-P(1B)-C(4B) -32.54(7)

Cl(2)-Ti(1)-P(1B)-C(4B) 93.75(7)

C(4A)-Ti(1)-P(1B)-C(4B) -167.65(8)

C(3B)-Ti(1)-P(1B)-C(4B) 32.57(8)

C(1B)-Ti(1)-P(1B)-C(4B) 101.95(9)

C(3A)-Ti(1)-P(1B)-C(4B) -173.19(8)

C(2B)-Ti(1)-P(1B)-C(4B) 69.70(8)

P(1A)-Ti(1)-P(1B)-C(4B) -125.96(7)

C(2A)-Ti(1)-P(1B)-C(4B) -142.33(8)

C(1A)-Ti(1)-P(1B)-C(4B) -115.63(8)

Cl(1)-Ti(1)-P(1B)-C(1B) -134.49(6)

Cl(2)-Ti(1)-P(1B)-C(1B) -8.21(6)

C(4A)-Ti(1)-P(1B)-C(1B) 90.39(7)

C(4B)-Ti(1)-P(1B)-C(1B) -101.95(9)

C(3B)-Ti(1)-P(1B)-C(1B) -69.38(7)

C(3A)-Ti(1)-P(1B)-C(1B) 84.86(7)

C(2B)-Ti(1)-P(1B)-C(1B) -32.25(7)

P(1A)-Ti(1)-P(1B)-C(1B) 132.09(6)

C(2A)-Ti(1)-P(1B)-C(1B) 115.72(8)

C(1A)-Ti(1)-P(1B)-C(1B) 142.41(7)

C(4B)-P(1B)-C(1B)-C(2B) 6.18(12)

Ti(1)-P(1B)-C(1B)-C(2B) 66.65(10)

C(4B)-P(1B)-C(1B)-C(7B) -179.72(13)

Ti(1)-P(1B)-C(1B)-C(7B) -119.25(13)

C(4B)-P(1B)-C(1B)-Ti(1) -60.47(6)

Cl(1)-Ti(1)-C(1B)-C(2B) -46.78(11)

Cl(2)-Ti(1)-C(1B)-C(2B) 55.25(9)

C(4A)-Ti(1)-C(1B)-C(2B) 158.37(10)

C(4B)-Ti(1)-C(1B)-C(2B) -72.35(10)

C(3B)-Ti(1)-C(1B)-C(2B) -33.21(10)

C(3A)-Ti(1)-C(1B)-C(2B) 133.26(10)

P(1A)-Ti(1)-C(1B)-C(2B) -164.06(9)

C(2A)-Ti(1)-C(1B)-C(2B) 138.28(10)

C(1A)-Ti(1)-C(1B)-C(2B) -176.69(9)

P(1B)-Ti(1)-C(1B)-C(2B) -118.91(11)

Cl(1)-Ti(1)-C(1B)-C(7B) -170.70(9)

Cl(2)-Ti(1)-C(1B)-C(7B) -68.68(12)

C(4A)-Ti(1)-C(1B)-C(7B) 34.45(12)

C(4B)-Ti(1)-C(1B)-C(7B) 163.73(14)

C(3B)-Ti(1)-C(1B)-C(7B) -157.13(14)

C(3A)-Ti(1)-C(1B)-C(7B) 9.34(13)

C(2B)-Ti(1)-C(1B)-C(7B) -123.92(17)

P(1A)-Ti(1)-C(1B)-C(7B) 72.01(12)

C(2A)-Ti(1)-C(1B)-C(7B) 14.36(15)

C(1A)-Ti(1)-C(1B)-C(7B) 59.38(15)

P(1B)-Ti(1)-C(1B)-C(7B) 117.17(14)

Cl(1)-Ti(1)-C(1B)-P(1B) 72.13(7)

Cl(2)-Ti(1)-C(1B)-P(1B) 174.15(4)

C(4A)-Ti(1)-C(1B)-P(1B) -82.72(6)

C(4B)-Ti(1)-C(1B)-P(1B) 46.56(6)

C(3B)-Ti(1)-C(1B)-P(1B) 85.70(7)

C(3A)-Ti(1)-C(1B)-P(1B) -107.83(6)

C(2B)-Ti(1)-C(1B)-P(1B) 118.91(11)

P(1A)-Ti(1)-C(1B)-P(1B) -45.16(5)

C(2A)-Ti(1)-C(1B)-P(1B) -102.81(7)

C(1A)-Ti(1)-C(1B)-P(1B) -57.78(9)

C(7B)-C(1B)-C(2B)-C(3B) 179.87(15)

P(1B)-C(1B)-C(2B)-C(3B) -6.36(17)

Ti(1)-C(1B)-C(2B)-C(3B) 59.09(12)

C(7B)-C(1B)-C(2B)-C(6B) -6.8(3)

P(1B)-C(1B)-C(2B)-C(6B) 166.94(14)

Ti(1)-C(1B)-C(2B)-C(6B) -127.61(16)

C(7B)-C(1B)-C(2B)-Ti(1) 120.78(15)

P(1B)-C(1B)-C(2B)-Ti(1) -65.45(8)

Cl(1)-Ti(1)-C(2B)-C(1B) 147.86(8)

Cl(2)-Ti(1)-C(2B)-C(1B) -122.61(9)

C(4A)-Ti(1)-C(2B)-C(1B) -23.21(11)

C(4B)-Ti(1)-C(2B)-C(1B) 86.87(11)

C(3B)-Ti(1)-C(2B)-C(1B) 122.43(15)

C(3A)-Ti(1)-C(2B)-C(1B) -57.96(11)

P(1A)-Ti(1)-C(2B)-C(1B) 20.68(11)

C(2A)-Ti(1)-C(2B)-C(1B) -81.43(14)

C(1A)-Ti(1)-C(2B)-C(1B) 12.1(3)

P(1B)-Ti(1)-C(2B)-C(1B) 40.04(8)

Cl(1)-Ti(1)-C(2B)-C(3B) 25.43(11)

Cl(2)-Ti(1)-C(2B)-C(3B) 114.96(10)

C(4A)-Ti(1)-C(2B)-C(3B) -145.64(10)

C(4B)-Ti(1)-C(2B)-C(3B) -35.55(10)

C(1B)-Ti(1)-C(2B)-C(3B) -122.43(15)

C(3A)-Ti(1)-C(2B)-C(3B) 179.61(10)

P(1A)-Ti(1)-C(2B)-C(3B) -101.75(10)

C(2A)-Ti(1)-C(2B)-C(3B) 156.14(12)

C(1A)-Ti(1)-C(2B)-C(3B) -110.3(3)

P(1B)-Ti(1)-C(2B)-C(3B) -82.39(10)

Cl(1)-Ti(1)-C(2B)-C(6B) -90.99(15)

Cl(2)-Ti(1)-C(2B)-C(6B) -1.46(14)

C(4A)-Ti(1)-C(2B)-C(6B) 97.94(16)

C(4B)-Ti(1)-C(2B)-C(6B) -151.97(18)

C(3B)-Ti(1)-C(2B)-C(6B) -116.4(2)

C(1B)-Ti(1)-C(2B)-C(6B) 121.15(19)

C(3A)-Ti(1)-C(2B)-C(6B) 63.20(17)

P(1A)-Ti(1)-C(2B)-C(6B) 141.83(13)

C(2A)-Ti(1)-C(2B)-C(6B) 39.7(2)

C(1A)-Ti(1)-C(2B)-C(6B) 133.3(3)

P(1B)-Ti(1)-C(2B)-C(6B) 161.19(17)

C(1B)-C(2B)-C(3B)-C(4B) 2.9(2)

C(6B)-C(2B)-C(3B)-C(4B) -170.64(16)

Ti(1)-C(2B)-C(3B)-C(4B) 62.79(12)

C(1B)-C(2B)-C(3B)-C(5B) 178.76(17)

C(6B)-C(2B)-C(3B)-C(5B) 5.2(3)

Ti(1)-C(2B)-C(3B)-C(5B) -121.33(18)

C(1B)-C(2B)-C(3B)-Ti(1) -59.91(12)

C(6B)-C(2B)-C(3B)-Ti(1) 126.57(15)

Cl(1)-Ti(1)-C(3B)-C(4B) 84.97(10)

Cl(2)-Ti(1)-C(3B)-C(4B) 179.42(10)

C(4A)-Ti(1)-C(3B)-C(4B) -68.91(13)

C(1B)-Ti(1)-C(3B)-C(4B) -85.80(11)

C(3A)-Ti(1)-C(3B)-C(4B) -119.54(16)

C(2B)-Ti(1)-C(3B)-C(4B) -118.76(15)

P(1A)-Ti(1)-C(3B)-C(4B) -12.92(12)

C(2A)-Ti(1)-C(3B)-C(4B) 122.8(3)

C(1A)-Ti(1)-C(3B)-C(4B) 40.90(16)

P(1B)-Ti(1)-C(3B)-C(4B) -39.14(9)

Cl(1)-Ti(1)-C(3B)-C(2B) -156.28(10)

Cl(2)-Ti(1)-C(3B)-C(2B) -61.83(10)

C(4A)-Ti(1)-C(3B)-C(2B) 49.85(14)

C(4B)-Ti(1)-C(3B)-C(2B) 118.76(15)

C(1B)-Ti(1)-C(3B)-C(2B) 32.96(9)

C(3A)-Ti(1)-C(3B)-C(2B) -0.8(2)

P(1A)-Ti(1)-C(3B)-C(2B) 105.84(10)

C(2A)-Ti(1)-C(3B)-C(2B) -118.5(2)

C(1A)-Ti(1)-C(3B)-C(2B) 159.65(10)

P(1B)-Ti(1)-C(3B)-C(2B) 79.62(10)

Cl(1)-Ti(1)-C(3B)-C(5B) -33.96(16)

Cl(2)-Ti(1)-C(3B)-C(5B) 60.49(16)

C(4A)-Ti(1)-C(3B)-C(5B) 172.16(15)

C(4B)-Ti(1)-C(3B)-C(5B) -118.9(2)

C(1B)-Ti(1)-C(3B)-C(5B) 155.28(19)

C(3A)-Ti(1)-C(3B)-C(5B) 121.53(18)

C(2B)-Ti(1)-C(3B)-C(5B) 122.3(2)

P(1A)-Ti(1)-C(3B)-C(5B) -131.85(15)

C(2A)-Ti(1)-C(3B)-C(5B) 3.8(4)

C(1A)-Ti(1)-C(3B)-C(5B) -78.0(2)

P(1B)-Ti(1)-C(3B)-C(5B) -158.07(18)

C(2B)-C(3B)-C(4B)-P(1B) 1.94(19)

C(5B)-C(3B)-C(4B)-P(1B) -173.94(15)

Ti(1)-C(3B)-C(4B)-P(1B) 68.63(10)

C(2B)-C(3B)-C(4B)-Ti(1) -66.69(12)

C(5B)-C(3B)-C(4B)-Ti(1) 117.44(18)

C(1B)-P(1B)-C(4B)-C(3B) -4.63(14)

Ti(1)-P(1B)-C(4B)-C(3B) -67.97(12)

C(1B)-P(1B)-C(4B)-Ti(1) 63.34(6)

Cl(1)-Ti(1)-C(4B)-C(3B) -89.82(10)

Cl(2)-Ti(1)-C(4B)-C(3B) -0.71(12)

C(4A)-Ti(1)-C(4B)-C(3B) 133.51(10)

C(1B)-Ti(1)-C(4B)-C(3B) 72.93(10)

C(3A)-Ti(1)-C(4B)-C(3B) 132.81(13)

C(2B)-Ti(1)-C(4B)-C(3B) 34.84(10)

P(1A)-Ti(1)-C(4B)-C(3B) 169.88(10)

C(2A)-Ti(1)-C(4B)-C(3B) -156.98(12)

C(1A)-Ti(1)-C(4B)-C(3B) -157.32(9)

P(1B)-Ti(1)-C(4B)-C(3B) 119.71(12)

Cl(1)-Ti(1)-C(4B)-P(1B) 150.47(6)

Cl(2)-Ti(1)-C(4B)-P(1B) -120.42(5)

C(4A)-Ti(1)-C(4B)-P(1B) 13.81(9)

C(3B)-Ti(1)-C(4B)-P(1B) -119.71(12)

C(1B)-Ti(1)-C(4B)-P(1B) -46.78(6)

C(3A)-Ti(1)-C(4B)-P(1B) 13.11(15)

C(2B)-Ti(1)-C(4B)-P(1B) -84.87(7)

P(1A)-Ti(1)-C(4B)-P(1B) 50.17(6)

C(2A)-Ti(1)-C(4B)-P(1B) 83.31(13)

C(1A)-Ti(1)-C(4B)-P(1B) 82.97(7)

C(2B)-C(1B)-C(7B)-C(12B) -42.3(2)

P(1B)-C(1B)-C(7B)-C(12B) 144.40(14)

Ti(1)-C(1B)-C(7B)-C(12B) 54.01(19)

C(2B)-C(1B)-C(7B)-C(8B) 139.09(16)

P(1B)-C(1B)-C(7B)-C(8B) -34.2(2)

Ti(1)-C(1B)-C(7B)-C(8B) -124.56(14)

C(12B)-C(7B)-C(8B)-C(9B) -0.4(2)

C(1B)-C(7B)-C(8B)-C(9B) 178.26(15)

C(7B)-C(8B)-C(9B)-C(10B) 0.4(3)

C(8B)-C(9B)-C(10B)-C(11B) 0.3(3)

C(9B)-C(10B)-C(11B)-C(12B) -0.9(3)

C(10B)-C(11B)-C(12B)-C(7B) 0.9(3)

C(8B)-C(7B)-C(12B)-C(11B) -0.2(2)

C(1B)-C(7B)-C(12B)-C(11B) -178.83(15)

________________________________________________________________

Symmetry transformations used to generate equivalent atoms:
